# Supplementary material
Source: publisher site journal article supplement (https://www.spandidos-publications.com/5513/downloadSupplementary)
Supplement: Supplementary file 1 [file downloadSupplementary]

## Sheet: Sheet1
Table SVI. GO and KEGG enrichment for 847 genes.
PSMC6
STYX
L2HGDH
DDHD1
SOS2
ARF6
GMFB
NAA30
TXNDC16
C14orf166
TM9SF3
IDE
TMX1
SCYL2
SOCS4
PPP2R5E
DAAM1
EIF4E
EXOC5
USP38
TMEM184C
TNPO1
SEC24A
PRRC1
GPR137C
G3BP2
TMEM87B
FAM35A
JKAMP
G2E3
GTF2A1
DENR
PTGES3
LARP4
DTWD2
SLC30A9
KLHL8
TMTC3
GTF2H3
RBM27
PDS5A
WDR36
CS
DHX15
SMARCAD1
WDR89
TRMT5
PUS7L
TMEM33
UHRF1BP1L
ATP2A2
RAD23B
TMED2
CNOT6
PAPOLA
NAA15
RALGAPA1
2022-03-05
FCF1
NAA25
TMEM192
ECT2
IBTK
ZBTB6
SCAMP1
IPO7
TOMM70A
TOP1
GFM1
C9orf91
CPSF2
AGGF1
SLC35A5
KIAA0391
COPB1
IARS
SMAD5
API5
SLC10A7
TDG
ZMPSTE24
ELMOD2
C4orf29
STRN3
REST
RPAP3
SNX6
VEZT
CCNT1
NMD3
CHUK
PTPN11
EIF3J
CSNK1A1
TNKS2
SLC25A46
SLC39A9
MATR3
SPATS2
DIP2B
PLEKHF2
PRDM4
ZBTB11
PSMD5
RAB14
GMCL1
EFR3A
SPTY2D1
UBR1
UEVLD
CLOCK
POLR3B
CLINT1
GRHL2
GSPT1
PPP1CC
UTP15
RBM12
SEC24B
COPB2
EIF5
TRAPPC6B
EIF4G2
LYSMD3
MRPL30
SRFBP1
SLAIN2
SLC33A1
ETF1
ZFP91
C9orf41
ARFIP1
ITCH
MBTPS2
IREB2
EIF2AK3
ADNP
USO1
APOOL
KIAA1715
FKTN
TMEM167A
USP7
TMED7
VPS33A
TMEM131
UBR7
CPSF6
C16orf72
GXYLT1
PGGT1B
CDC23
ATP5S
HMGXB4
GTF3C4
FAF2
KIF3B
PHAX
PDPK1
MARVELD2
YIPF6
FAM91A1
TTC37
MAPK1IP1L
PUM2
SLC30A5
SDAD1
FAM199X
SYNJ2BP
MSH3
PPP1R15B
KIAA0586
UBXN4
XPO1
KIAA1958
TMOD3
OCRL
LIN54
DLG3
ABCE1
USP9X
STT3B
POC1B
TWF1
TXNDC9
C5orf51
RANBP9
LCOR
RAB3D
PRDM10
C2orf69
SLC35F5
DPY19L4
QTRTD1
ZNF770
NUBPL
SETD7
ACTR2
TRIP11
UHRF1BP1
MRPL42
HN1L
KPNB1
NBN
YTHDF3
AFF4
SP1
ZNF468
UBA6
C5orf24
MPP5
PANK3
ASAH2B
AASDHPPT
RARS
EPT1
PPM1A
SRP72
PURB
ICK
CTAGE5
CTDSPL2
LARP1B
GPR107
DARS2
SEC24D
APC
PPP2CA
SLC30A6
PRKAG1
SLC30A7
DBT
PREPL
RBM12B
SUDS3
OPA1
AVL9
LRRC58
RBAK
UBQLN1
C12orf29
SLC35A3
NLN
THAP5
PDXDC1
SEL1L
METAP2
YY1
PRKCI
NEDD1
ARID2
ERBB2IP
GAPVD1
PIK3C2A
PPIP5K2
FBXW2
2022-03-07
STAM2
LMBR1
UBE2N
RBBP5
HLTF
ATP13A3
DNAJC10
HNRNPK
POLR1B
CDS1
DDX46
KPNA3
FBXO21
UBFD1
HSPA8
MTDH
AZIN1
KIAA1033
USP47
USP46
TDP1
RNF14
SLK
BCLAF1
IARS2
KPNA1
ADNP2
TMBIM6
CLCN3
LCLAT1
XRCC5
SLC25A40
BAG5
RRN3
SBNO1
SENP1
COPS4
UBR3
METTL2B
BTBD7
IPO11
APAF1
SCOC
LMAN1
RNF13
GEMIN5
PAK2
PDCD6IP
EPB41L5
TUG1
BIRC6
UBE4A
MAP4K3
MAPRE1
BTBD10
MFAP3
COL4A3BP
DDX6
NSF
PHTF2
ZNF678
NDUFS1
SEC23IP
TOX4
EIF2S1
KPNA4
CSNK1G3
SCARB2
NIPA2
ERGIC1
SRP54
RLIM
MIER3
ACAP2
ZNF562
GRSF1
ACBD3
CELF1
LATS1
ATAD1
LARP1
RAB3GAP2
ZNF41
NSD1
LMBRD2
EEA1
PARG
SPTLC1
SRBD1
YWHAB
VPS41
THAP6
SNX13
MAPK14
CSNK2A1
ERCC8
CDC27
COG5
RNF139
ANKRD13C
PDCD10
ZNF845
FUBP3
CDK13
KIF5B
ARL1
UBE2W
ZSCAN29
YIPF5
ANKIB1
ZNF28
CCDC125
TARDBP
ANKRD32
KCTD20
ZNF207
XRN2
PWP1
HEATR5B
SUCLA2
RNF4
FAR1
KLF3
RACGAP1
TROVE2
WAPAL
VKORC1L1
DHFR
MAP9
PHC3
ZNF410
KLHL28
PRDX3
TMEM185B
AP4E1
DNAJB14
SET
UBE3C
FANCM
MAPK9
VDAC1
ZBTB1
ALG10
KIF21A
C6orf62
FAM151B
FBXO45
MAPK1
CBLL1
AP3M1
CEP350
RAB5A
XPO4
SEC23B
FYTTD1
TRUB1
ERI2
MRPL19
ZNF800
ATP6V1A
ZYG11B
ALG10B
FAM179B
CASP3
COMMD10
SRPK2
RP2
PIGM
HSPA9
ZNF268
ERO1L
ASB8
PPP4R2
CPNE3
CDC73
UHMK1
YME1L1
ZNF518A
UBE2D2
ATG12
CKAP5
LIN7C
RAB10
TRPM7
DCUN1D1
DLST
GFM2
RC3H1
WASL
KIF2A
SPTLC2
C10orf12
MIB1
FBXO33
TAB3
TOR1AIP2
SLC38A2
TMEM106B
HECTD1
PDIK1L
PSEN1
RBM18
PPP3R1
ACTR6
C6orf120
CUL4B
USP37
GPR160
RFC1
YLPM1
RAD50
ZNF200
PWWP2A
TMEM209
ENTPD7
CNOT4
RNF103
SMEK2
HMGCR
WDR41
METAP1
C5orf22
DCTN5
XPOT
SMG7
NCBP1
DLD
MRS2
SMARCA5
CCNK
PRIM1
TRAPPC10
MAP4K5
BZW1
MFSD8
STRN
ZFYVE16
TUBGCP4
DCLRE1A
WDFY3
HIAT1
COX15
FBXW11
IPO8
CAPZA1
TAB2
SMC2
LSG1
PDZD8
FBXO28
DDX20
TCF12
NAPG
ESCO2
G3BP1
ATG2B
TMEM87A
ZNF664
YTHDC2
PRKAR2A
PPID
CASC4
ARPP19
COG6
CXorf23
SLC38A1
WAC
PIGN
ATP2B1
CEP97
HNRNPF
STX17
DDX3X
GTF2H1
FAM84B
BMPR1A
EXD2
RAPGEF6
SLC2A10
MAP3K2
DNAJC14
UBE2K
SNAP23
CTCF
NFYB
PLA2G12A
ZNF2
TGFBRAP1
LIN52
RMI1
KIAA0232
RANBP2
MED14
RAB5B
CUL5
LCORL
USP8
TM9SF2
ZNF12
RDH11
KRR1
FASTKD5
SLC25A36
DPP8
INTS2
CBX5
FASTKD2
DERL1
UBE2D3
ZNF253
KIF20B
ZC3H14
C9orf152
BDP1
GPN3
UBE3A
CISD2
MMADHC
FAM160B1
RCOR1
WDR26
STAG2
ARL5A
LARS
SUPT16H
PIK3CB
ANAPC1
2022-03-06
UTP14C
NECAP1
UBE3B
MAPK6
NSUN3
TMED8
MBLAC2
MRPS35
YWHAG
SLC35B3
VAMP7
LNX2
MAGT1
TMPO
NUP43
NIPA1
ATF7IP
PCYOX1
ZNF721
POLA1
EXOC8
GSTCD
FLVCR1
NUP50
ZNF320
UBN2
DIS3
IMPAD1
SCFD2
NAA50
TSNAX
RBM47
DCTN4
ZNF669
DBR1
CANX
DDX21
WSB2
UTP20
EIF2AK1
SERINC3
PRMT3
DLAT
HIF1AN
FNIP1
KIAA1143
VPS8
TRIP12
GCC2
EP300
LYPLA1
STK35
STAM
NOC3L
ZC3HAV1
PPM1B
GNA13
GTF2I
RCHY1
MIOS
RPP14
SPPL2A
THRAP3
PBRM1
DZIP3
PTCD3
METTL14
USP42
ERCC4
KIAA0196
GRPEL2
TLK1
ZNF260
NF1
ZNF765
PLEKHB2
PI4K2B
XRCC4
SMG1
BAZ1A
DLG1
C5orf15
PDCL
UBE2G1
GOSR1
MGA
TRIM32
SMARCC1
PSME3
DOPEY2
OSBP
WDR44
ATRX
TTC26
CYB5R4
DCAF17
GORASP2
RABL3
SHPRH
ACLY
MED6
COPZ1
NARS
ZFHX3
OTUD4
DYM
EAF1
MYO5C
DNAJC13
CRCP
CRKL
SNX4
EXOC6
TIMM17A
MFN1
FEM1B
PDE12
PEX1
RNF111
USP16
NEDD4
PHF6
ASXL2
VTA1
KDM5B
TFAM
PRPF4B
GOLGA4
MINPP1
ZBTB41
ZMYM4
ZWILCH
ROCK1
ARHGAP5
UBXN2B
TERF1
ATL3
ERLEC1
AMMECR1L
CNOT6L
TCTN3
ATF1
LRCH3
PJA2
CSNK1G1
YTHDC1
NUPL1
FAM98B
ZNF708
SPAST
GNL3L
COPS2
NAA35
C4orf46
FCHO2
FBXO34
ANKHD1
XPNPEP3
BRWD3
SMC1A
NDFIP2
SAMD12
ZNF281
GLE1
HAUS3
RTF1
RAB33B
TRIM23
ARL8B
SELT
ZNF143
RNF20
MNAT1
RAB11FIP2
ZKSCAN5
FAM175B
RBM41
FAM120A
PHF8
PAICS
NUFIP2
MRPL44
SETD3
SETD5
KBTBD7
N4BP2
GOLGA1
SUZ12
BAZ2A
GNAQ
AAGAB
IPMK
CANT1
DCK
NHLRC2
GIGYF2
GABPA
LEO1
CTR9
ATP8B1
ZNF701
NUP155
ZNF609
PCYT1A
TOR1B
PLAGL2
ZNF623
BTBD1
ATP6V0A2
VBP1
DHX29
HOOK1
GAB1
SGPL1
C12orf66
ATP7A
ZDHHC20
ZNF398
TDP2
TAF2
TMEM127
PGM3
TM9SF4
RPE
EXOC1
RHBDD1
TRIM24
TFCP2
RGMB
UBXN7
FEM1C
RRM1
MCM8
DAZAP2
RFX7
TIMM9
SLC31A1
STARD3NL
PPP3CB
RMND5A
MON2
TPD52
GPBP1
SPOPL
PPHLN1
ARID4A
SECISBP2L
RFK
MOSPD1
NOLC1
AP1G1
ZMYM1
THUMPD1
GSK3B
ARL6IP1
TAOK1
CAB39
NEK1
FAM13B
VTI1A
FANCF
DBF4
